# Supplementary material
Source: publisher figshare collection journal article supplement (https://acs.figshare.com/ndownloader/files/5759217)
Supplement: Supplementary file 1 [file 5759217]

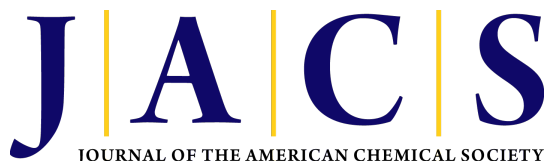

JOURNAL OF THE AMERICAN CHEMICAL SOCIETY

J. Am. Chem. Soc., 1998, 120(36), 9388-9389, DOI:[10.1021/ja980518r](https://doi.org/10.1021/ja980518r)

#### Terms & Conditions

Electronic Supporting Information files are available without a subscription to ACS Web Editions. The American Chemical Society holds a copyright ownership interest in any copyrightable Supporting Information. Files available from the ACS website may be downloaded for personal use only. Users are not otherwise permitted to reproduce, republish, redistribute, or sell any Supporting Information from the ACS website, either in whole or in part, in either machine-readable form or any other form without permission from the American Chemical Society. For permission to reproduce, republish and redistribute this material, requesters must process their own requests via the RightsLink permission system. Information about how to use the RightsLink permission system can be found at <http://pubs.acs.org/page/copyright/permissions.html>

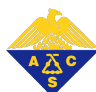

ACS Publications

MOST TRUSTED. MOST CITED. MOST READ.

Copyright © 1998 American Chemical Society

JAP80518R

## Supplemental Information :

## “Carbenes from Olefins ...” by Coalter, Spivak, Gérard, Clot, Eisenstein, and Caulton

**Preparation of  $\text{RuHCl}(\text{P}^i\text{Pr}_3)_2$  :**

Under Ar, 1.00 g (2.18 mmol) of  $\text{RuH}_2\text{Cl}_2(\text{P}^i\text{Pr}_3)_2$  and 0.321 g (2.18 mmol) of lithium 2,2,6,6-tetramethylpiperidide were added to a Schlenk flask equipped with a stir bar. Approximately 40 mL of benzene was added and the reaction allowed to stir 4-5 hours. The solvent was removed under vacuum and the solid residue was dried overnight *in vacuo*. The soluble products were extracted with pentane (ca. 3 times with 20 mL each). The pentane extracts were then combined and the solvent removed into a liquid  $\text{N}_2$  trap. The reddish-brown crude product was washed once with 10 mL of hexamethyldisiloxane and dried *in vacuo* to yield 0.665 g of  $\text{RuHCl}(\text{P}^i\text{Pr}_3)_2$  (72 %).  $^1\text{H}$  NMR (400 MHz,  $\text{C}_6\text{D}_6$ , 20° C):  $\delta$  -24.2 (t,  $^2J_{\text{P-H}} = 32.8$  Hz, Ru-H),  $\delta$  1.34 (dvt,  $J_{\text{P-H}} = ^3J_{\text{H-H}} = 6.2$  Hz, 18H,  $\text{P}(\text{CHMe}_2)_3$ ),  $\delta$  1.36 (dvt,  $J_{\text{P-H}} = ^3J_{\text{H-H}} = 6.2$  Hz, 18H,  $\text{P}(\text{CHMe}_2)_3$ ),  $\delta$  2.19 (m, 6H,  $\text{P}(\text{CHMe}_2)_3$ ).  $^{31}\text{P}\{^1\text{H}\}$  NMR (162.0 MHz,  $\text{C}_6\text{D}_6$ , 20° C):  $\delta$  84.1 (s).  $^{13}\text{C}\{^1\text{H}\}$  NMR (75.5 MHz,  $\text{C}_6\text{D}_6$ , 20° C):  $\delta$  20.8 (s,  $\text{P}(\text{CHMe}_2)_3$ ),  $\delta$  21.2 (s,  $\text{P}(\text{CHMe}_2)_3$ ),  $\delta$  28.4 (vt,  $J_{\text{P-C}} = 6.4$  Hz,  $\text{P}(\text{CHMe}_2)_3$ ).

**Preparation and Analysis of  $\text{RuHCl}(\text{P}^i\text{Pr}_3)_2(=\text{CMeOEt})$  :**

Under Ar, 25 mg (0.055 mmol) of  $\text{RuHCl}(\text{P}^i\text{Pr}_3)_2$  was placed in an NMR tube in  $\text{C}_6\text{D}_6$ . Via syringe, 5.2  $\mu\text{L}$ , (0.055 mmol) of  $\text{CH}_2=\text{CHOEt}$  was added and the NMR tube capped.  $^1\text{H}$ ,  $^{13}\text{C}\{^1\text{H}\}$ , and  $^{31}\text{P}\{^1\text{H}\}$  NMR spectra taken after approximately 30 minutes reveal quantitative conversion to  $\text{RuHCl}(\text{P}^i\text{Pr}_3)_2(=\text{CMeOEt})$ .  $^1\text{H}$  NMR (300 MHz,  $\text{C}_6\text{D}_6$ , 20° C):  $\delta$  -21.65 (t,  $^2J_{\text{P-H}} = 22.8$  Hz, 1H, Ru-H),  $\delta$  1.13 (dvt,  $J_{\text{P-H}} = ^3J_{\text{H-H}} = 6.3$  Hz, 18H,  $\text{P}(\text{CHMe}_2)_3$ ),  $\delta$  1.25 (dvt,  $J_{\text{P-H}} = ^3J_{\text{H-H}} = 6.3$  Hz, 18H,  $\text{P}(\text{CHMe}_2)_3$ ),  $\delta$  1.17 (t,  $^3J_{\text{H-H}} = 7.2$  Hz, 3H,  $\text{Ru}=\text{CMeOCH}_2\text{CH}_3$ ),  $\delta$  2.33-2.44 (m, 6H,  $\text{P}(\text{CHMe}_2)_3$ ),  $\delta$  2.69 (s, 3H,  $\text{Ru}=\text{CMeOEt}$ ),  $\delta$  4.37 (q,  $^3J_{\text{H-H}} = 7.5$  Hz, 2H,  $\text{Ru}=\text{CMeOCH}_2\text{CH}_3$ ).  $^{31}\text{P}\{^1\text{H}\}$  NMR (121.4 MHz,  $\text{C}_6\text{D}_6$ , 20° C):  $\delta$  58.2 (s).  $^{13}\text{C}\{^1\text{H}\}$  NMR (75.5 MHz,  $\text{C}_6\text{D}_6$ , 20° C):  $\delta$  14.6 (s,  $\text{Ru}=\text{CMeOCH}_2\text{CH}_3$ ),  $\delta$  19.7 (s,  $\text{P}(\text{CHMe}_2)_3$ ),  $\delta$  20.4 (s,  $\text{P}(\text{CHMe}_2)_3$ ),  $\delta$  26.2 (vt,  $J_{\text{P-C}} = 9.1$  Hz,  $\text{P}(\text{CHMe}_2)_3$ ),  $\delta$  40.8 (s,  $\text{Ru}=\text{CMeOEt}$ ),  $\delta$  68.5 (s,  $\text{Ru}=\text{CMeOCH}_2\text{CH}_3$ ),  $\delta$  289.8 (t,  $^2J_{\text{P-C}} = 9.7$  Hz,  $\text{Ru}=\text{CMeOEt}$ ).

Upon cooling a sample of  $\text{RuHCl}(\text{P}^i\text{Pr}_3)_2(=\text{CMeOEt})$  in toluene- $d_8$  to -90° C, slowed rotation of the ruthenium carbene bond gives rise to the decoalescence of the two isomers which differ in E/Z stereochemistry about the (X)(Y)Ru=CRR' bond.  $^1\text{H}$  NMR (400 MHz, toluene- $d_8$ , -80° C): New signals are seen at  $\delta$  4.95 and 4.29 (1:10 in population and coalesce to the time averaged signal at  $\delta$  4.38,  $\text{Ru}=\text{CMeOCH}_2\text{CH}_3$ ),  $\delta$  2.06 and 2.87 (1:10 and coalesce at  $\delta$  2.68,  $\text{Ru}=\text{CMeOCH}_2\text{CH}_3$ ), and  $\delta$  -25.38 and -21.29 (1:10 and coalesce at  $\delta$  -21.68, Ru-H).  $^{31}\text{P}\{^1\text{H}\}$  NMR (162.0 MHz, toluene- $d_8$ , -80° C):  $\delta$  51.8 and 56.4 (1:10 and coalesce at  $\delta$  56.0).

**Reaction of  $\text{RuHCl}(\text{P}^i\text{Pr}_3)_2$  with  $\text{CH}_2=\text{CHOEt}$  - Detection of  $\text{RuHCl}(\text{P}^i\text{Pr}_3)_2(\text{CH}_2=\text{CHOEt})$  :**

Under Ar,  $\text{RuHCl}(\text{P}^i\text{Pr}_3)_2$  (10 mg, 0.022 mmol) was dissolved in toluene- $d_8$  (ca. 0.5 mL) in an NMR tube equipped with a Teflon stopcock. The  $\text{CH}_2=\text{CHOEt}$  (2.0  $\mu\text{L}$ , 0.022 mmol) was then added to the NMR tube such that it did not mix with the toluene- $d_8$  solution. The sample was then cooled in a dry-ice/isopropanol bath, shaken to thoroughly mix the reagents and placed immediately in a pre-cooled (-85° C) NMR spectrometer probe. The probe temperature was subsequently raised in 10° C increments (allowing 10 minutes to stabilize at each interval) and the  $^1\text{H}$  and  $^{31}\text{P}\{^1\text{H}\}$  spectra were recorded. Selected NMR spectroscopic data for  $\text{RuHCl}(\text{P}^i\text{Pr}_3)_2(\text{CH}_2=\text{CHOEt})$  :  $^1\text{H}$  NMR (300 MHz,

toluene- $d_8$ ):  $\delta$  -15.52 (t,  $^2J_{P-H} = 17.7$  Hz, 1H, Ru-*H*),  $\delta$  3.69 (m, 1H, Ru(CH<sub>2</sub>=CHOCH<sub>2</sub>CH<sub>3</sub>)),  $\delta$  4.35 (m, 1H, Ru(CH<sub>2</sub>=CHOCH<sub>2</sub>CH<sub>3</sub>)),  $\delta$  2.02 (m, 3H, P(CHMe<sub>2</sub>)<sub>3</sub>),  $\delta$  2.32 (m, 3H, P(CHMe<sub>2</sub>)<sub>3</sub>).  $^{31}P\{^1H\}$  NMR (121.4 MHz, toluene- $d_8$ ):  $\delta$  40.8, 46.0 (AB pattern,  $^2J(P_A-P_B) = 300$  Hz).

#### Reaction of RuHCl(P<sup>i</sup>Pr<sub>3</sub>)<sub>2</sub> with CH<sub>2</sub>=CH<sub>2</sub> - Stable Adduct Formation :

Under Ar, 10 mg (0.022 mmol) RuHCl(P<sup>i</sup>Pr<sub>3</sub>)<sub>2</sub> was added to an NMR tube equipped with a Teflon stopcock. The tube was filled with C<sub>6</sub>D<sub>6</sub> to a predetermined mark on the tube so that the remaining head space volume was 4.0 mL (approximately 0.5 mL C<sub>6</sub>D<sub>6</sub>). The NMR tube was cooled to zero degrees to freeze the benzene- $d_6$  and was then evacuated. It was then filled with CH<sub>2</sub>=CH<sub>2</sub> to 95 mm Hg and the stopcock closed (0.022 mmol CH<sub>2</sub>=CH<sub>2</sub>). The tube was then warmed to room temperature, shaken, and its  $^1H$  and  $^{31}P\{^1H\}$  NMR spectra taken over 30 minute intervals. The stable adduct that formed showed little or no decomposition over a period of several hours. Spectroscopic data for RuHCl(P<sup>i</sup>Pr<sub>3</sub>)<sub>2</sub>(CH<sub>2</sub>=CH<sub>2</sub>) is as follows :  $^1H$  NMR (400 MHz, C<sub>6</sub>D<sub>6</sub>, 20° C):  $\delta$  -22.0 (t,  $^2J_{P-H} = 18.0$  Hz, Ru-*H*),  $\delta$  1.15 (dvt,  $J_{P-H} = ^3J_{H-H} = 6.0$  Hz, 18H, P(CHMe<sub>2</sub>)<sub>3</sub>),  $\delta$  1.20 (dvt,  $J_{P-H} = ^3J_{H-H} = 6.0$  Hz, 18H, P(CHMe<sub>2</sub>)<sub>3</sub>), 2.25 (m, 6H, P(CHMe<sub>2</sub>)<sub>3</sub>),  $\delta$  2.79 (t,  $^4J_{P-H} = 3.2$  Hz, 4H, Ru(CH<sub>2</sub>=CH<sub>2</sub>)).  $^{31}P\{^1H\}$  NMR (162.0 MHz, C<sub>6</sub>D<sub>6</sub>, 20° C):  $\delta$  44.1 (s).

## Notes :

#### Preparation of CH<sub>2</sub>=CDOEt :

The isotopically labeled olefin was prepared by hydrolysis of CH<sub>2</sub>=C(Li)OEt with an excess of D<sub>2</sub>O in o-xylene at -10° C. Filtration and fractional distillation (30-35° C fraction) of the resulting mixture yields 99% enriched CH<sub>2</sub>=C(D)OEt. Preparation of the lithio salt, CH<sub>2</sub>=C(Li)OEt is described in detail by Knorr, Rudolf, and Roman : *Angew. Chem. Int. Ed. Engl.* **1984**, *23*, 366-367.

#### Isolation of RuHCl(P<sup>i</sup>Pr<sub>3</sub>)<sub>2</sub>(=CMeOEt) :

The complex RuHCl(P<sup>i</sup>Pr<sub>3</sub>)<sub>2</sub>(=CMeOEt) can be isolated as a orange-brown viscous oil in a Schlenk flask from benzene if a larger quantity than can easily be generated *in situ* is required. No suitable wash solvent has been found as the complex is very soluble in most common organic solvents.

#### Preparation of RuDCl(P<sup>i</sup>Pr<sub>3</sub>)<sub>2</sub> :

Method 1 : Substitution of RuD<sub>2</sub>Cl<sub>2</sub>(P<sup>i</sup>Pr<sub>3</sub>)<sub>2</sub> for its hydrido counterpart in the preparation above. RuD<sub>2</sub>Cl<sub>2</sub>(P<sup>i</sup>Pr<sub>3</sub>)<sub>2</sub> was prepared with 99% enrichment by stirring RuH<sub>2</sub>Cl<sub>2</sub>(P<sup>i</sup>Pr<sub>3</sub>)<sub>2</sub> under an atmosphere of D<sub>2</sub> in CH<sub>2</sub>Cl<sub>2</sub> for 4 hours at 25° C. The headspace gases were removed and the flask refilled with D<sub>2</sub> once during this time period. The crude RuD<sub>2</sub>Cl<sub>2</sub>(P<sup>i</sup>Pr<sub>3</sub>)<sub>2</sub> was then washed with ether and dried *in vacuo*.

Method 2 : RuDCl(P<sup>i</sup>Pr<sub>3</sub>)<sub>2</sub> was prepared by stirring RuHCl(P<sup>i</sup>Pr<sub>3</sub>)<sub>2</sub> in a small amount of acetone- $d_6$  for 12 hours at 25° C to allow isotopic exchange through the enol tautomer of the acetone- $d_6$ .

## Reference :

1. Grünwald, C.; Gevert, O.; Wolf, J.; González-Herrero, P.; Werner, H. *Organometallics* **1996**, *15*, 1960-1962.
